# Supplementary material for: A unique activation–promotion mechanism of the influenza B M2 proton channel uncovered by multiscale simulations
Source: Royal Society of Chemistry journal article supplement (doi:10.1039/c9cp00130a), 2019-01-01
Supplement: c9cp00130a1.pdf [file c9cp00130a1.pdf]

**Table S1.** The stepwise and average  $pK_a$  values of the His19 and His27 tetrad are obtained by Toyama<sup>[a]</sup>, Hong Mei<sup>[b]</sup> and Wang Jun<sup>[c]</sup> in various lipid membranes.

|            | the His19 tetrad |            |            | the His27 tetrad |            |
|------------|------------------|------------|------------|------------------|------------|
|            | Toyama's         | Hong Mei's | Wang Jun's | Toyama's         | Hong Mei's |
| $pK_{a1}$  | -                | 6.1        | -          | -                | 7.9        |
| $pK_{a2}$  | -                | 5.7        | -          | -                | 5.9        |
| $pK_{a3}$  | -                | 4.5        | 4.49       | -                | 5.9        |
| $pK_{a4}$  | -                | 4.2        | 3.10       | -                | 5.8        |
| $av\ pK_a$ | 6.5              | 5.1        | -          | 7.6              | 6.4        |

<sup>[a]</sup>Data from Journal of biochemistry 2009, 145, 543-554.

<sup>[b]</sup>Data from Journal of the American Chemical Society 2016, 138, 8143-8155.

<sup>[c]</sup>Data from Biochemistry 2009, 48, 9949-9951.



**Table S3.** The QM/MM models of the neutral ( $His27_4^0$ ) and full-cationic ( $His27_4^{4+}$ ) systems

| system                         | neutral ( $His27_4^0$ ) systems      |                                     |                                     | full-cationic ( $His27_4^{4+}$ ) systems |                                     |                                    |
|--------------------------------|--------------------------------------|-------------------------------------|-------------------------------------|------------------------------------------|-------------------------------------|------------------------------------|
|                                | Q1                                   | Q2                                  | Q3                                  | Q1                                       | Q2                                  | Q3                                 |
| The state of the His19 tetrad  |                                      |                                     |                                     |                                          |                                     |                                    |
| QM model                       | Four His19 and three water molecules | Four His19 and four water molecules | Four His19 and five water molecules | Four His19 and two water molecules       | Four His19 and Five water molecules | Four His19 and six water molecules |
| The atomic numbers of QM model | 54                                   | 58                                  | 62                                  | 51                                       | 61                                  | 65                                 |
| Total atomic numbers           | 34385                                | 34386                               | 34387                               | 34381                                    | 34382                               | 34383                              |
| Total simulation time(ns)      | 32.5                                 | 32.5                                | 32.5                                | 32.5                                     | 32.5                                | 32.5                               |

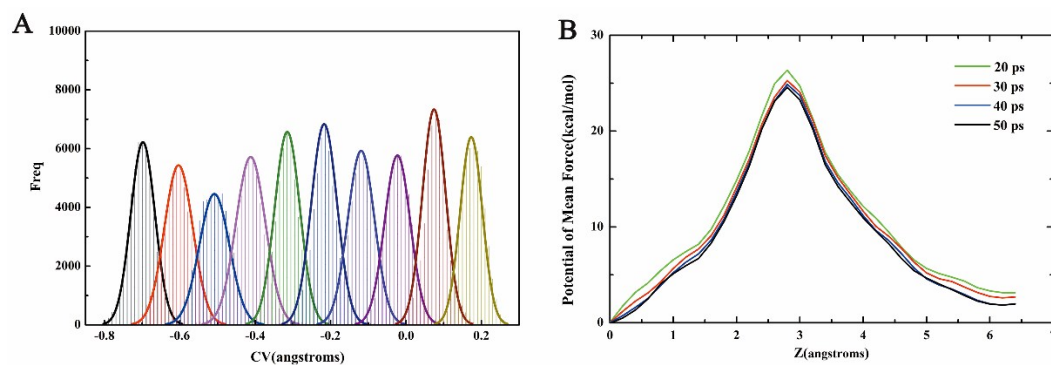

**Fig. S1** (A) The overlap between the simulation windows for the Q1 state channel in full-cationic ( $His27^4_+$ ) systems. (B) Convergence of the PMFs calculated by umbrella sampling, where 50 ps US simulations were performed for the Q1 state channel in full-cationic ( $His27^4_+$ ) systems. PMFs are shown with the simulation time of 20, 30, 40, and 50 ps, respectively.

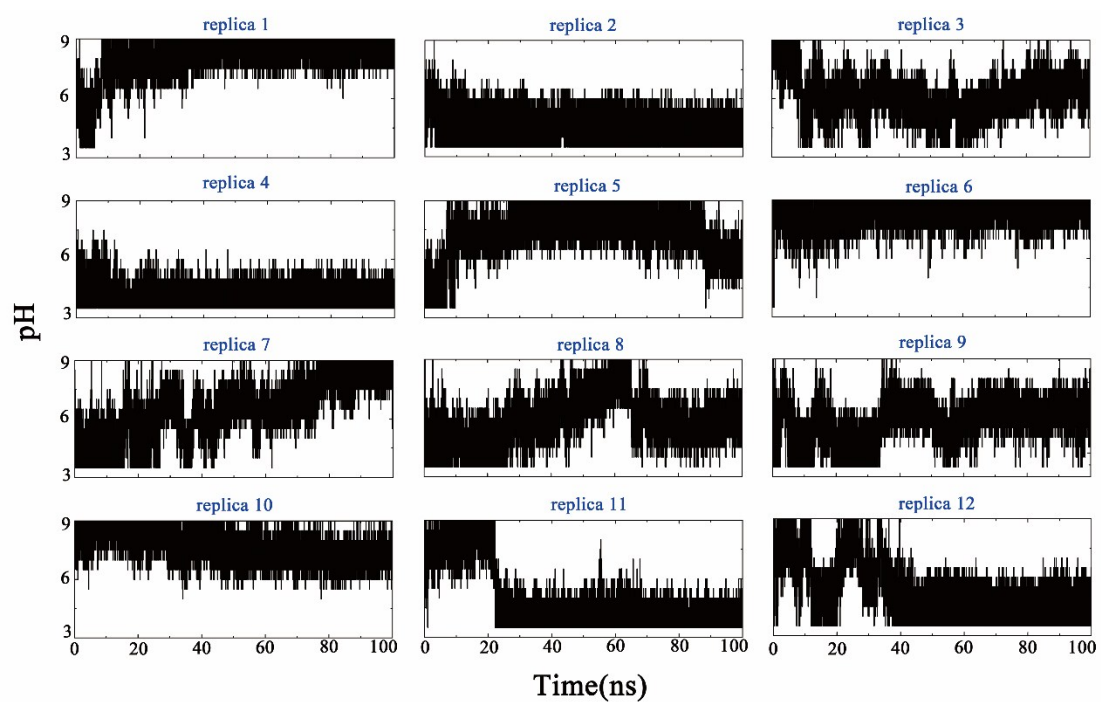

**Fig. S2** Replica walk in the pH space as a function of simulation time for 12 pH replicas.

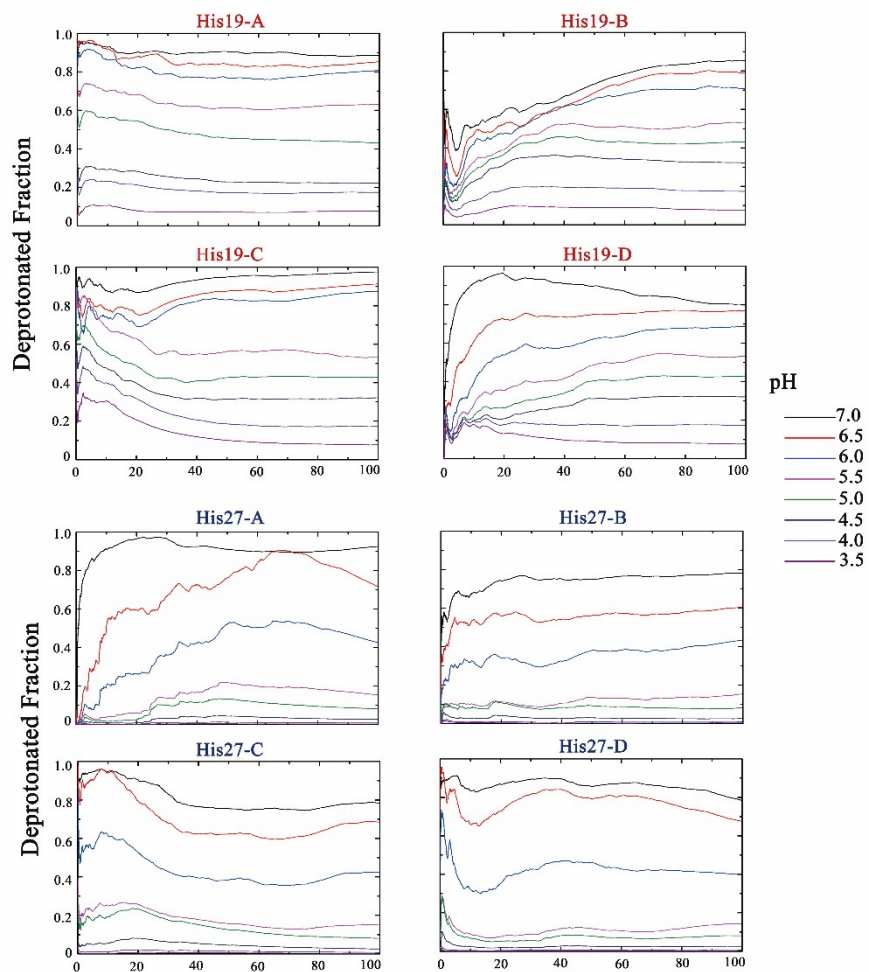

**Fig. S3** The deprotonated fraction of His19 and His27 tetrad as a function of simulation time.

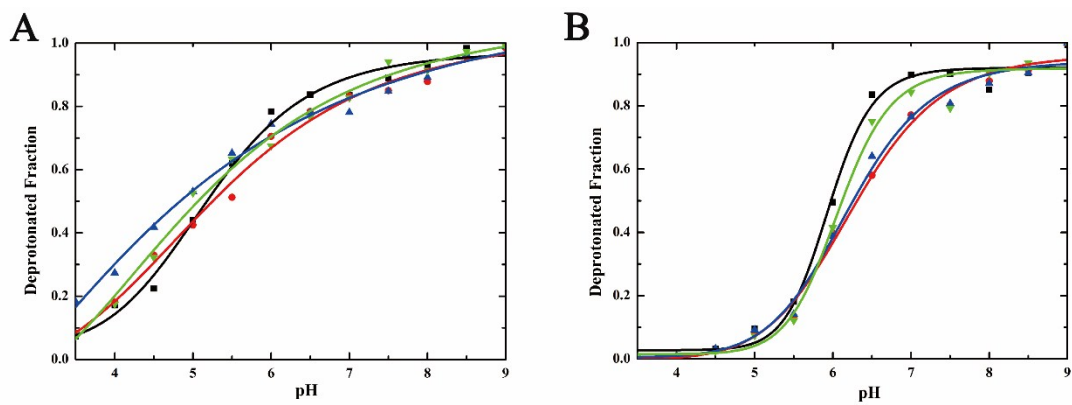

**Fig. S4** Microscopic titration of His19 and His27. (A) Deprotonated fraction of individual His19 residues at different pH, and four microscopic  $pK_a$ 's: 4.97, 5.19, 5.23, and 5.35. (B) Deprotonated fraction of individual His17 residues at different pH, and four microscopic  $pK_a$ 's: 6.00, 6.18, 6.33, and 6.37. Four colors represent four residues.

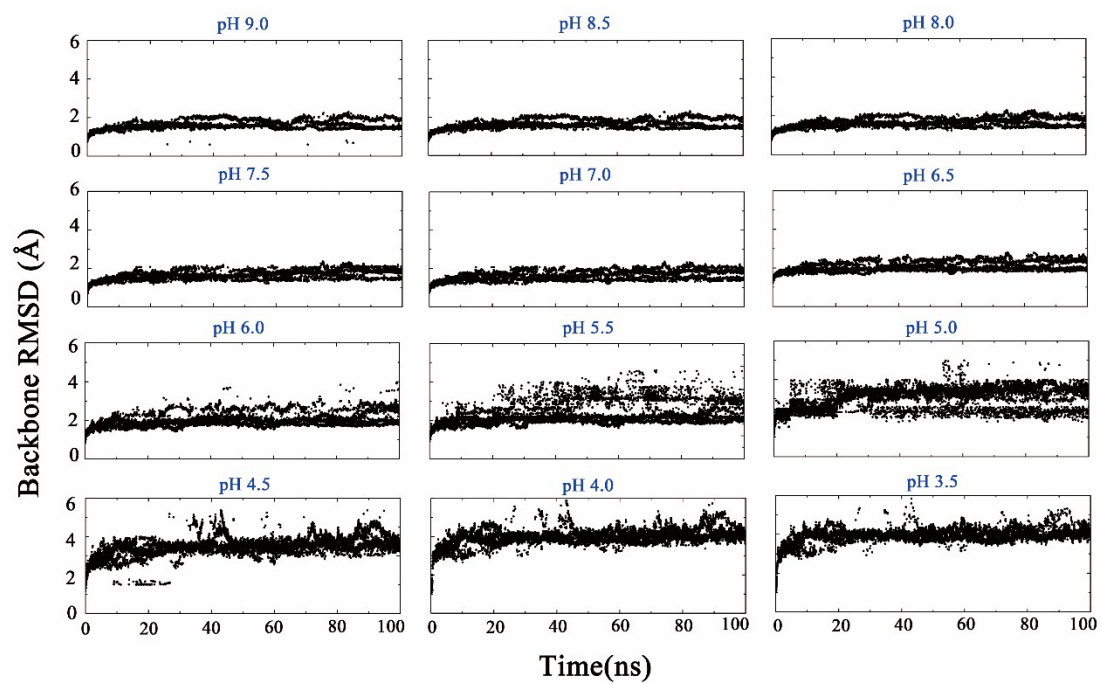

**Fig. S5** The backbone RMSD with respect to the equilibrium structure as a function of simulation time under simulated pH conditions.



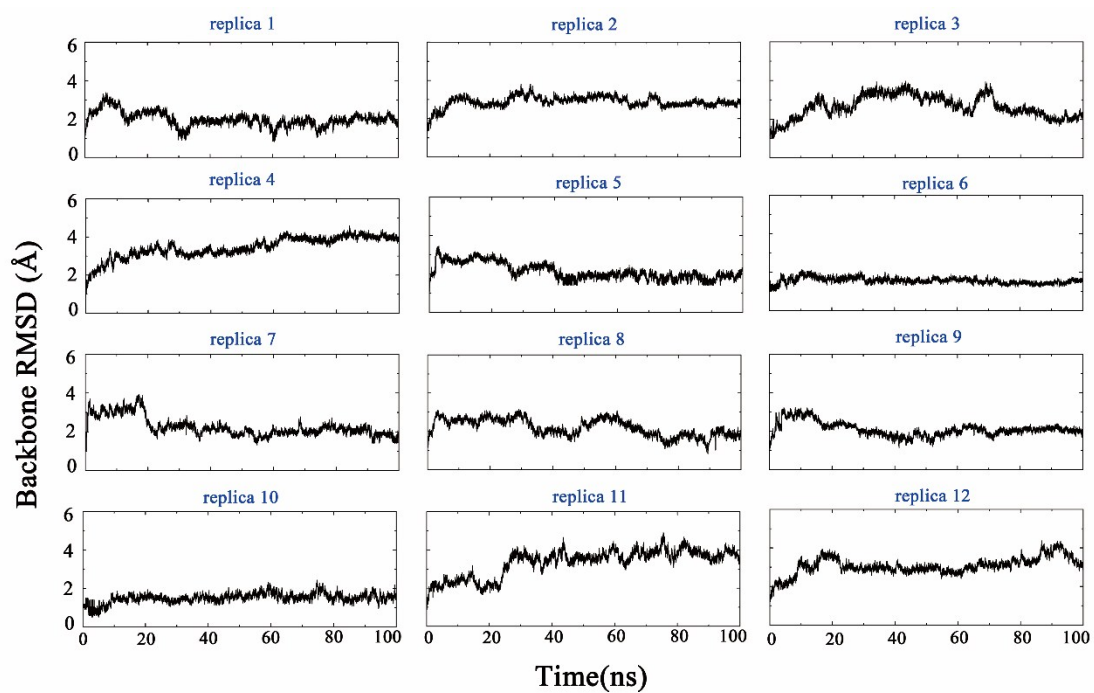

**Fig. S6** The backbone RMSD with respect to the equilibrium structure as a function of simulation time for all replicas.

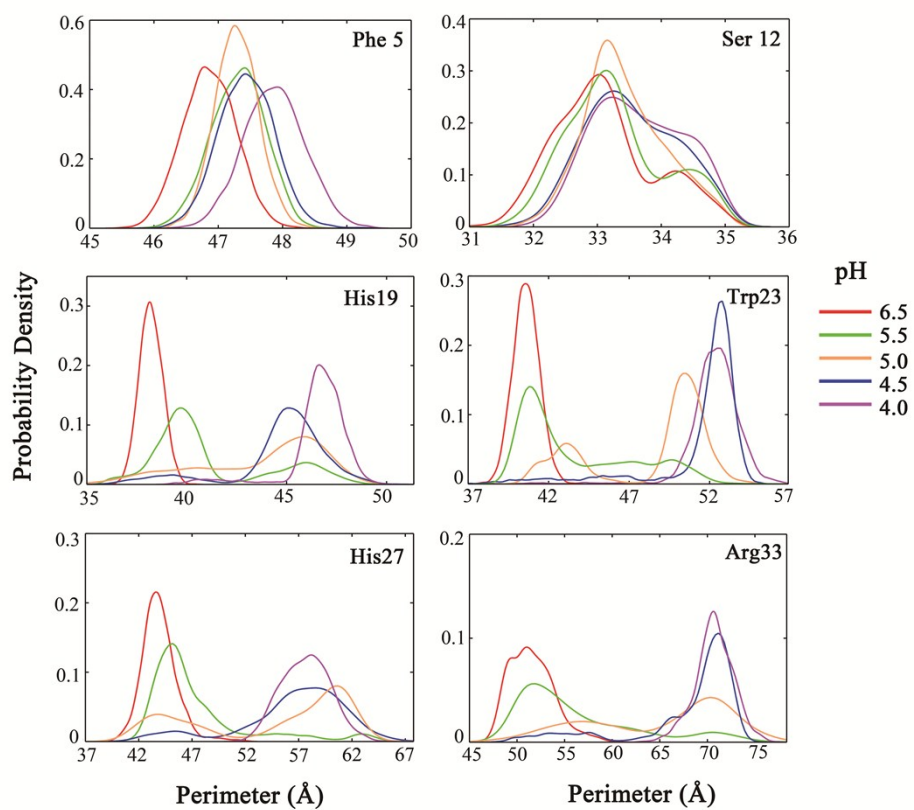

**Fig. S7** Probability distribution of perimeters at different locations along the pore of BM2 under different pH conditions.

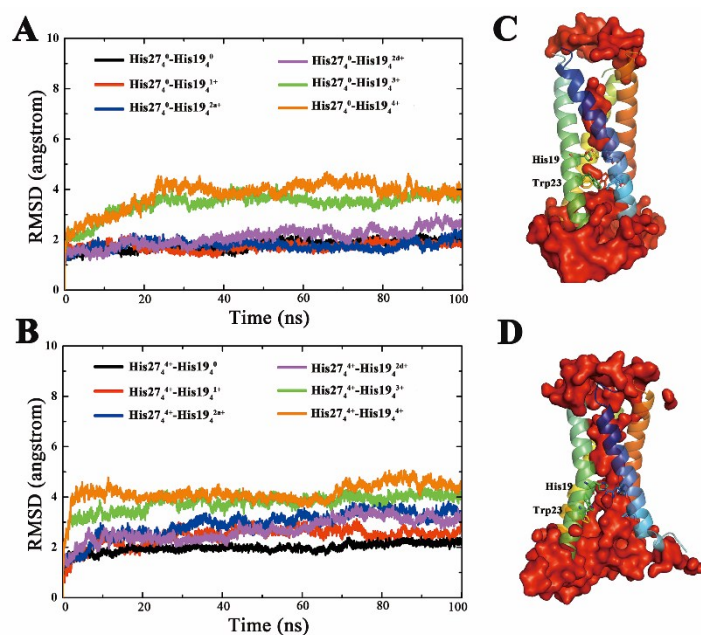

**Fig. S8** The RMSD values of the protein backbone atoms with respect to the initial frame of the production step as a function of simulation time. (A) The RMSD values when the His19 tetrad is at 0, +1, +2a (adjacent position), +2d (diagonal position), +3 and +4 charge state in the  $His27_4^0$  systems. (B) The RMSD values in the  $His27_4^{4+}$  systems. (C) The distribution of water density for closed state calculated from the simulation is shown as red shading. (D) The distribution of water density for open state.
